# Supplementary material
Source: PubMed Central journal article supplement (PMC5364046)
Supplement: NIHMS847316-supplement-Supplemental_material.pdf [file NIHMS847316-supplement-Supplemental_material.pdf]

# Supplement Material

Fig. Suppl. I

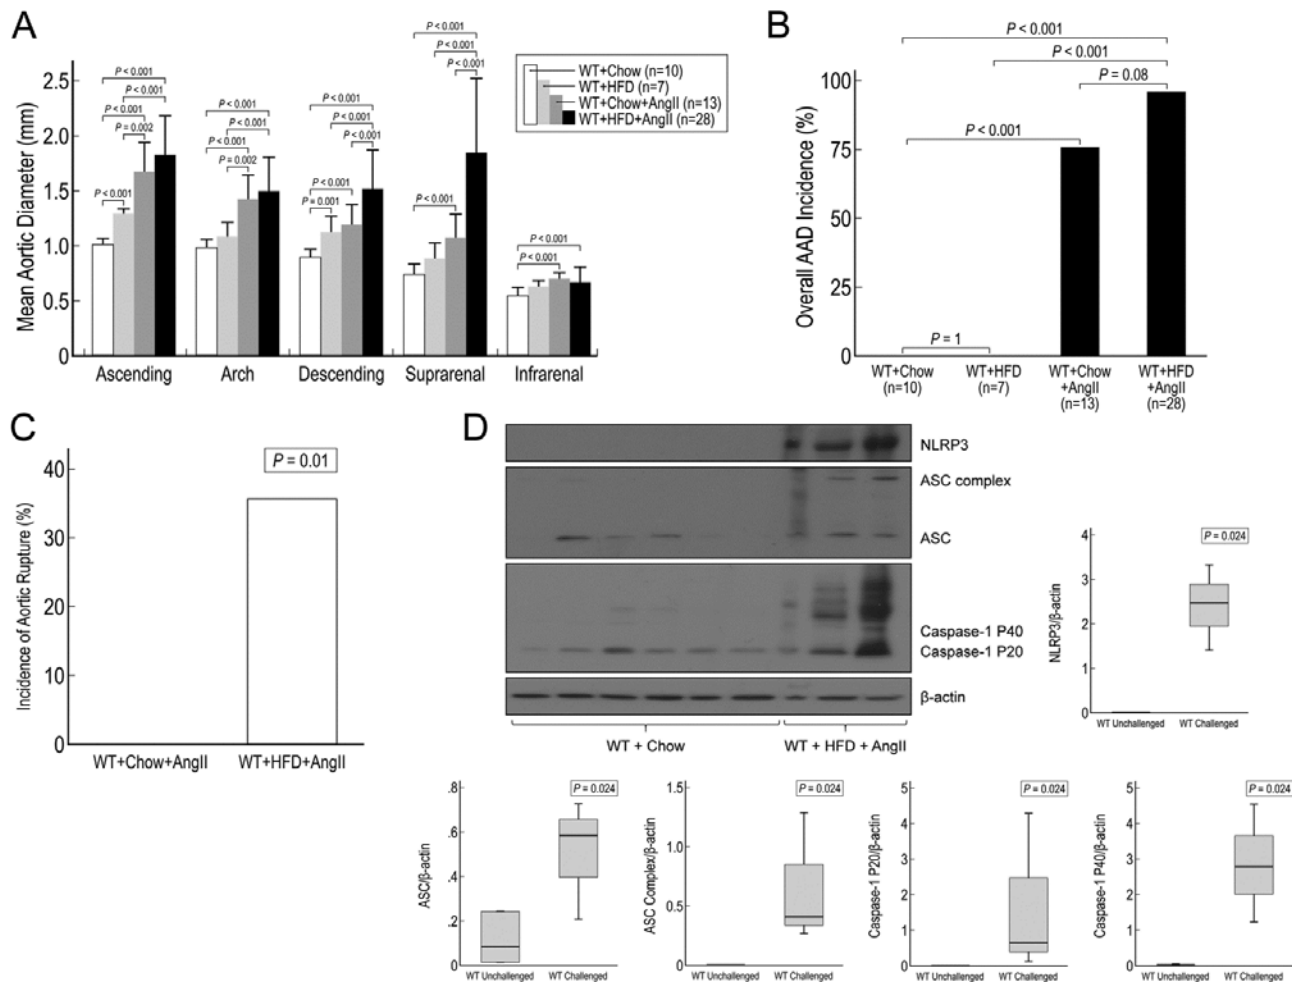

**Figure SI.** (A) Mean aortic diameters in wild-type (WT) mice challenged with angiotensin II (AngII) and/or a high-fat diet (HFD) versus those in WT mice challenged with AngII alone. Incidence of AAD formation (B) and aortic rupture (C) in WT mice challenged with AngII and a HFD versus those in WT mice challenged with Ang II alone. (D) Western blot analysis and quantification of NLRP3, ASC, and caspase-1 levels in aortic protein lysates from unchallenged WT mice (WT+chow) and challenged WT mice that were infused with AngII and fed with a HFD.

Fig. Suppl. II

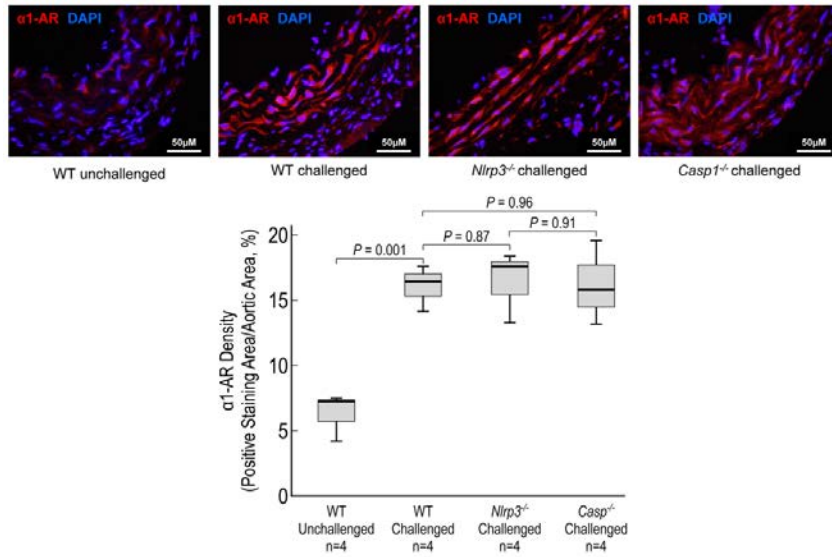

**Figure SII.** Density of  $\alpha$ 1-adrenergic receptor (AR) is the same in WT, *Nlrp3*<sup>-/-</sup>, and *Casp1*<sup>-/-</sup> mice challenged groups. Immunofluorescence staining and quantification of  $\alpha$ 1-AR density in aortic tissue from unchallenged WT mice and challenged WT, *Nlrp3*<sup>-/-</sup>, and *Casp1*<sup>-/-</sup> mice.
